# Supplementary material for: NF-κB upregulates glutamine-fructose-6-phosphate transaminase 2 to promote migration in non-small cell lung cancer
Source: PubMed Central journal article supplement (PMC6421657; doi:10.1186/s12964-019-0335-5), 2019-03-18
Supplement: 12964_2019_335_MOESM1_ESM.pdf [file 12964_2019_335_MOESM1_ESM.pdf]

## Additional File 1

### **NF- $\kappa$ B Upregulates Glutamine-Fructose-6-Phosphate Transaminase 2 to Promote Migration in Non-Small Cell Lung Cancer**

Szymon J. Szymura<sup>1</sup> $\Psi$ , Jacob P. Zaemes<sup>1</sup>, David F. Allison<sup>1</sup>, Sheena H. Clift<sup>1</sup>, Jaclyn M. D'Innocenzi<sup>1</sup>, Lisa G. Gray<sup>1</sup>, Brian D. McKenna<sup>1</sup>, Benjamin B. Morris<sup>1,2</sup>, Stefan Bekiranov<sup>1</sup>, Robin D. LeGallo<sup>2</sup>, David R. Jones<sup>3</sup>, and Marty W. Mayo<sup>1\*</sup>

<sup>1</sup>Department of Biochemistry & Molecular Genetics, <sup>2</sup>Department of Pathology, University of Virginia, P.O. Box 800733, Charlottesville, VA 22908, USA; <sup>3</sup>Department of Thoracic Surgery, Memorial Sloan-Kettering Cancer Center, New York, NY 10065, USA

This document contains the following additional information:

Supplementary Tables (5 total)  
Supplementary Figures (5 total)

**Supplementary Table 1: shRNA and siRNA sequences**

| <b>Company</b>                | <b>Target</b>                            | <b>siRNA Target Sequence</b>                                                              |
|-------------------------------|------------------------------------------|-------------------------------------------------------------------------------------------|
| GE Dharmacon<br>(D-001206-13) | siRNA Non-targeting<br>Control<br>Pool 1 | UAGCGACUAAACACAUCAA<br>UAAGGCUAUGAAGAGAUAC<br>AUGUAUUGGCCUGUAUUAG<br>AUGAACGUGAAUUGCUCAA  |
| GE Dharmacon<br>(M-019111-00) | Human <i>OGT</i><br>SMART pool           | GCAGUUCGCUUGUAUCGUA<br>CGACAUGCAUUGCGUCUCA<br>GAUUAAGCCUGUUGAAGUC<br>CCGAGAAAUUGGCUUAUUAU |
| GE Dharmacon<br>(M-010390-01) | Human <i>GFPT2</i><br>SMART pool         | UCGCCAAGCUGAUUAAAUA<br>GAUCAUCCGUGGCUUGAGA<br>AGACAAAGGCAACGAAUUU<br>CGAUGGGAAUAAUCACGAA  |

| <b>Company</b>                | <b>Target</b>              | <b>Mature Target Sequence</b> |
|-------------------------------|----------------------------|-------------------------------|
| GE Dharmacon<br>(V2THS_50314) | TRIPZ human GFPT2<br>shRNA | TCAGATGAAAGGTGGTGAT           |

## Supplementary Table 2: RT-qPCR primer sequences

### Primer Sequences for *H. sapiens*

| Gene             | Sequence                      |
|------------------|-------------------------------|
| <i>GAPDH</i> F   | GAAGGTGAAGGTCGGAGTC           |
| <i>GAPDH</i> R   | GAAGATGGTGATGGGATTTTC         |
| <i>SNAI1</i> F   | CACTATGCCGCGCTCTTTC           |
| <i>SNAI1</i> R   | GGTCGTAGGGCTGCTGGAA           |
| <i>SNAI2</i> F   | ATGAGGAATCTGGCTGCTGT          |
| <i>SNAI2</i> R   | CAGGAGAAAATGCCTTTGGA          |
| <i>ZEB2</i> F    | CAATACCGTCATCCTCAGCA          |
| <i>ZEB2</i> F    | CCAATCCCAGGAGGAAAAAC          |
| <i>TWIST1</i> F  | CGGGAGTCCGCAGTCTTA            |
| <i>TWIST1</i> R  | CTTGAGGGTCTGAATCTTGCT         |
| <i>OGT</i> F     | AGGAAATGTCTTGAAAGAGGCAC       |
| <i>OGT</i> R     | TCGTAGTACACACAAGCCCAGG        |
| <i>SLC2A1</i> F  | CATCAACGCTGTCTTCTATTACTC      |
| <i>SLC2A1</i> R  | ATGCTCAGATAGGACATCCA          |
| <i>SLC1A4</i> F  | CTGTGGACTGGATTGTGGAC          |
| <i>SLC1A4</i> R  | TCCACTTTCACCTCAGCAAG          |
| <i>NT5E</i> F    | TGGAGATGGGTTCAGATGATAA        |
| <i>NT5E</i> R    | GGATAAATTACTTTTCATTTTGGAGATAT |
| <i>UUP1</i> F    | ACTGCCCAGGTAGAGACTATC         |
| <i>UUP1</i> R    | CTGCACCAGCTTCTTGTTAAG         |
| <i>GFPT1</i> F   | CCAGCCAGTTTGTATCCCTT          |
| <i>GFPT1</i> R   | CAAGCATGATCTCTTTGCGT          |
| <i>GFPT2</i> F   | AGGTGCATTCGCGCTGGTT           |
| <i>GFPT2</i> R   | TGTGGAGAGCTTGTATTTGCTCCCGGG   |
| <i>UAP1</i> F    | AATGACCTCAAACCTCACGTTGT       |
| <i>UAP1</i> R    | GCTCTGCATAAAGTTCTACCTGT       |
| <i>MGEA5</i> F   | TCCATAACCCAAGGTCTTCCA         |
| <i>MGEA5</i> R   | TTGGAGGAGCGGGAGAGCGA          |
| <i>TNFAIP3</i> F | TTGACCAGGACTTGGGACTT          |
| <i>TNFAIP3</i> R | ACAGCTTTCGCGCATATTGCT         |
| <i>BIRC3</i> F   | GCTGTGATGGTGGACTCAGG          |
| <i>BIRC3</i> R   | TGGCTTGAACCTTGACGGATG         |
| <i>HPRT</i> F    | TTGGAAAGGGTTATTCCTCA          |
| <i>HPRT</i> R    | TCCAGCAGCTCAGCAAAGAA          |

**Supplementary Table 3: Antibodies**

| <b>Antibody Target</b> | <b>Company</b>          | <b>Product Number</b>             |
|------------------------|-------------------------|-----------------------------------|
| $\alpha$ -Tubulin      | Sigma                   | T6793                             |
| E-Cadherin             | Santa Cruz              | sc-7870                           |
| Fibronectin            | BD Bioscience           | 610078                            |
| Flag M2                | Sigma                   | F1804                             |
| GAPDH                  | GeneTex                 | GTX627408                         |
| GFPT1                  | Cell Signaling          | 3818                              |
| GFPT2                  | Cell Signaling          | 6917                              |
| GFPT2 (IHC)            | Atlas                   | HPA059910                         |
| MMP9                   | R&D Systems             | MAB936                            |
| N-Cadherin             | BD Transduction<br>Labs | 610920                            |
| Normal IgG (ChIP)      | Santa Cruz              | sc-2025 (mouse)<br>Rabbit sc-2027 |
| OGA                    | Sigma                   | SAB4200311                        |
| OGT                    | Sigma                   | O6264                             |
| O-GlcNAc RL-2          | Thermo Scientific       | MA1-072                           |
| O-GlcNAc CTD10.1       | Cell Signaling          | 98705s                            |
| p65 C-20 (ChIP)        | Santa Cruz              | Sc-372                            |
| V5                     | Invitrogen              | R960-25                           |
| Vimentin               | Sigma                   | V6630                             |

## Supplementary Table 4: ChIP-PCR primer sequences corresponding to the *GFPT2* gene

### *GFPT2* Locus

### Sequence

|                                 |                        |
|---------------------------------|------------------------|
| <i>H. sapiens</i> ChIP site A F | TCCTGCCCTTCCCAGTGATAAA |
| <i>H. sapiens</i> ChIP site A R | CTTTGCTTATTGTCCTGTTG   |
| <i>H. sapiens</i> ChIP site B F | AGTGGCAAGGGTGAGCTTCT   |
| <i>H. sapiens</i> ChIP site B R | TTGCACAATGCCTGCCTG     |

### Site A:

TCCTGCCCTTCCCAGTGATAAAATGAACCTCATTGGAAAATCCCCCACTTCAGTGTAGATGATGATTCTCATTG  
TGTCCCCAAAGCAGGGAGGCTCCAGGAGGCCACCCACACCCAAACTGGACTCCAGCCCTGACTCAGGAT  
GAGTAATTGAAAAGAAAACAACAGGACAATAAGCAAAG

### Site B:

AGTGGCAAGGGTGAGCTTCTGAGGTGGGATGATCTCAGGGCCTCCGGGAGTGACTCAGAGGTATTTGGCTGTGA  
TGCTGGCAAACATTTTTCCCCCTTCCCGGTTTTCCCTGTTCTTGACTTAAGTCACTCCAAGGGCAGATCACCA  
GGGAGGAGAGGGAGTTGGCCAGGCAGGCATTGTGCAA

## SUPPLEMENTARY TABLES

### Supplementary Table 5: Metabolic genes upregulated during EMT

#### Genes

|         |          |          |
|---------|----------|----------|
| ABAT    | GLS1     | SLC2A1   |
| ACO1    | GPAM     | SLC4A7   |
| ACSL5   | HK2      | SLC6A6   |
| ADA     | HKDC1    | SLC6A8   |
| AGPAT4  | HLCS     | SLC6A10P |
| AGPAT6  | HMOX2    | SLC16A2  |
| AK8     | HS3ST3B1 | SLC22A4  |
| ATP5C1  | IDS      | SLC25A37 |
| B4GALT1 | INPP4B   | SLC39A8  |
| BCAT1   | ITPKC    | SLC43A3  |
| BMP2    | LSS      | SMAD5    |
| BPGM    | MAP2K1   | SMAD7    |
| CDA     | MBOAT2   | SMOX     |
| CHKB    | MTAP     | SMS      |
| CHST11  | MTHFD1L  | SOD2     |
| CHST2   | NAMPT    | SPHK1    |
| CPT1B   | NDST1    | SPTLC2   |
| CYP2B6  | NEDD4L   | SQLE     |
| CYP2R1  | NT5E     | ST3GAL1  |
| DHRS3   | ODC1     | SYNJ2    |
| DIO2    | PANK2    | TDO2     |
| DSE     | PECR     | UAP1     |
| ENO3    | PGK2     | UBA6     |
| FA2H    | PGM2     | UBE2D1   |
| FSTL1   | PIK3CD   | UBE2D3   |
| GAD1    | PLCB4    | UBE2E2   |
| GALNT12 | PLD1     | UBE2O    |
| GALNT5  | PNPLA8   | UPP1     |
| GCH1    | PPAP2B   | UXS1     |
| GFPT2   | PTGES    | XDH      |
| GGH     | PTGS2    | XYLT1    |
| GK      | PYGL     |          |
| GK3P    | SAT1     |          |

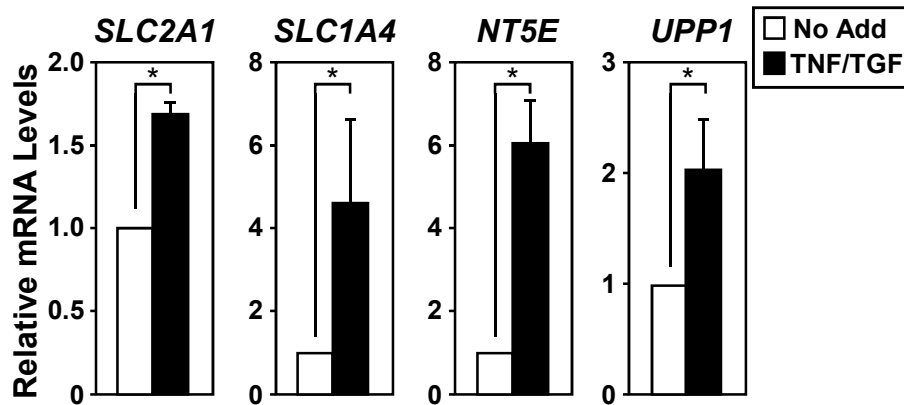

**Supplementary Figure 1: RT-qPCR analysis confirms the upregulation of metabolic genes.** Data represents three independent experiments performed in triplicate; mRNA levels were calculated relative to *HPRT* mRNA expression. Mean +SD are shown; \*  $p < 0.05$ .

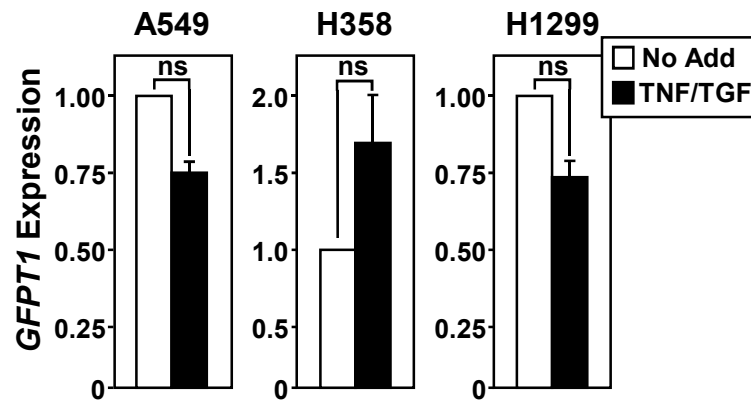

**Supplementary Figure 2: Unlike *GFPT2*, *GFPT1* mRNA expression is not upregulated in NSCLC spheroid cultures following TNF and TGF $\beta$  stimulation, as detected by RT-qPCR analysis.** Data represents three independent experiments performed in triplicate; mRNA levels were calculated relative to *HPRT* mRNA expression. Mean  $\pm$  SD are shown; ns – not significant.



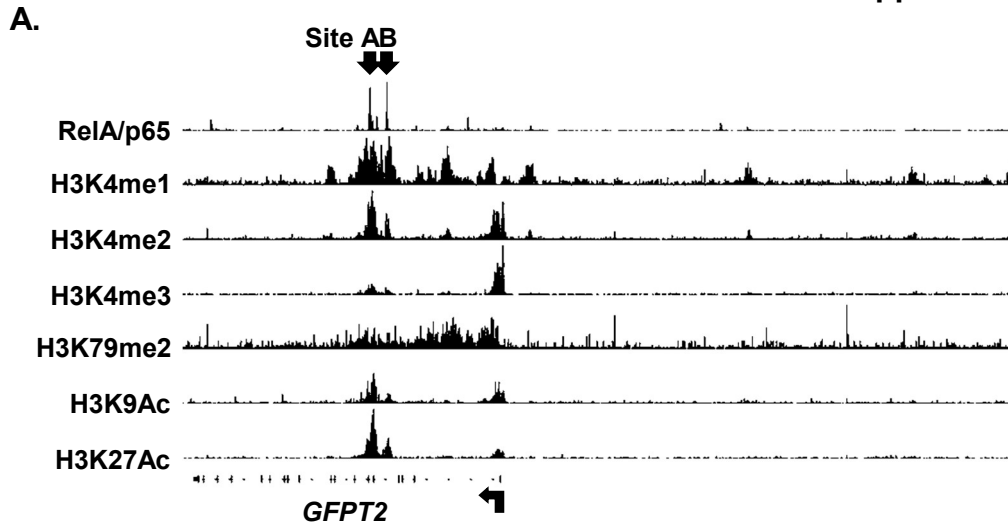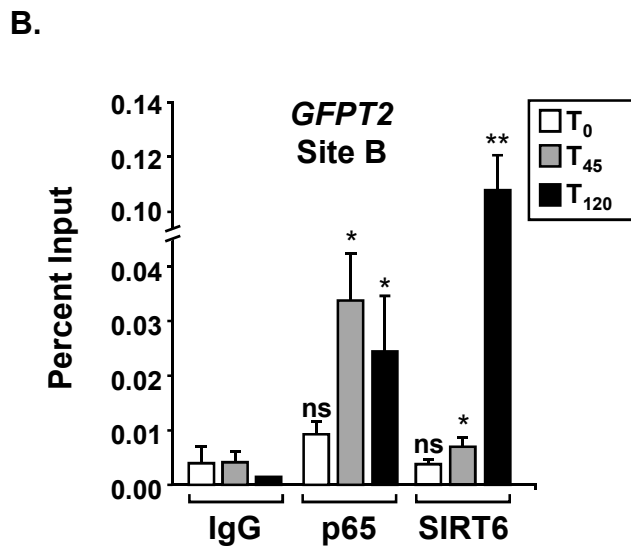

**Supplementary Figure 3: The *GFPT2* gene is regulated by NF- $\kappa$ B and SIRT6.** (A) A screen shot of the *GFPT2* gene showing ChIP-seq enrichments for RelA/p65 are localized to Site A and B, which correspond to the image shown in Figure 6A. (B) ChIP-qPCR analysis across the Site B of the *GFPT2* locus indicates elevated chromatin occupancy of p65 and SIRT6 in TNF stimulated A549 cells. Data represent changes in ChIP-qPCR relative to percent input. Mean and SD  $\pm$  are shown; \*  $p < 0.05$ , \*\*  $p < 0.01$ , ns - not significant;  $n = 3$ .

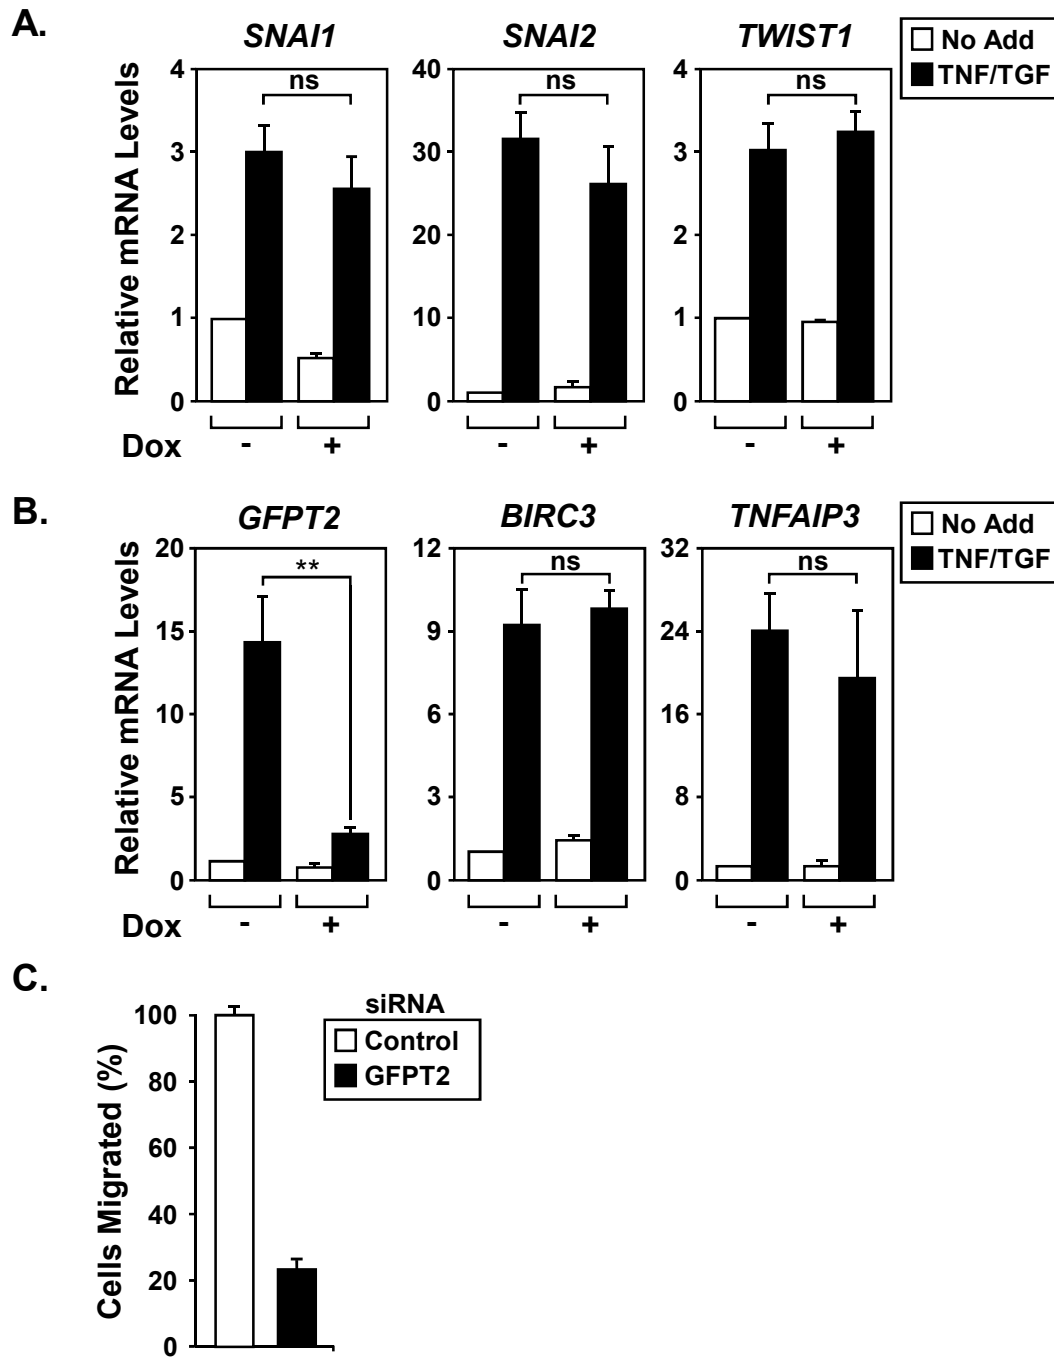

**Supplementary Figure 4: Knockdown of *GFPT2* fails to impact the expression of NF- $\kappa$ B-regulated genes as well as mesenchymal markers, but is required for cell migration.** (A & B) Knockdown of *GFPT2* following Dox treatment of A549:sh*GFPT2* cells fails to show changes in mesenchymal markers *SNAI1*, *SNAI2*, or *TWIST1*, as well as NF- $\kappa$ B transcriptional targets, *BIRC3* and *TNFAIP3* following stimulation. (C) siRNA-mediated silencing of *GFPT2* abolished H1299 cell migration, in a similar manner as data shown in Figure 7D. Mean and SD  $\pm$  are shown; \*\*  $p < 0.01$ , ns - not significant;  $n = 3$ .

**A.**

**Disease Free Survival**

| <b>GFPT2 Expression</b> | <b>Total Cases</b> | <b>Relapsed/Progressed Cases</b> | <b>Median Months Survival</b> |
|-------------------------|--------------------|----------------------------------|-------------------------------|
| High                    | 63                 | 36                               | 22.9                          |
| Low                     | 82                 | 34                               | 44.02                         |

**B.**

**Overall Survival**

| <b>GFPT1 Expression</b> | <b>Total Cases</b> | <b>Deceased Cases</b> | <b>Median Months Survival</b> |
|-------------------------|--------------------|-----------------------|-------------------------------|
| High                    | 101                | 44                    | 39.32                         |
| Low                     | 133                | 45                    | 39.72                         |

**Disease Free Survival**

| <b>GFPT1 Expression</b> | <b>Total Cases</b> | <b>Relapsed/Progressed Cases</b> | <b>Median Months Survival</b> |
|-------------------------|--------------------|----------------------------------|-------------------------------|
| High                    | 82                 | 39                               | 26.94                         |
| Low                     | 118                | 52                               | 28.42                         |

**Supplementary Figure 5: Elevated *GFPT2*, but not *GFPT1*, mRNA expression correlates with poor overall and disease free survival.**(A) As shown in Table 3 elevated *GFPT2* expression is associated with reduced overall survival and with reduced median months disease free survival. (B) Unlike *GFPT2*, *GFPT1* expression is not predictive of overall or disease free survival.
